# Supplementary material for: Internal states drive nutrient homeostasis by modulating exploration-exploitation trade-off
Source: eLife journal article supplement (doi:10.7554/elife.19920), 2016-10-22
Supplement: supp [file elife-19920-supp-v2.zip]

Archive with 13 entries (13 files):
- elife_poa_e19920_Figure_1_figure_supplement_1.pdf
- elife_poa_e19920_Figure_6_figure_supplement_1.pdf
- elife_poa_e19920_Figure_8_figure_supplement_1.pdf
- elife_poa_e19920_Figure_2_figure_supplement_2.pdf
- elife_poa_e19920_Figure_7_figure_supplement_1.pdf
- elife_poa_e19920_Figure_4_figure_supplement_1.pdf
- elife_poa_e19920_Figure_4_figure_supplement_3.pdf
- elife_poa_e19920_Figure_2_figure_supplement_3.pdf
- elife_poa_e19920_Figure_5_figure_supplement_1.pdf
- elife_poa_e19920_Figure_2_figure_supplement_1.pdf
- elife_poa_e19920_Figure_3_figure_supplement_1.pdf
- elife_poa_e19920_Figure_4_figure_supplement_2.pdf
- elife_poa_e19920_Video_1.mp4
