# Supplementary figures and images for: Internal states drive nutrient homeostasis by modulating exploration-exploitation trade-off
Source: eLife journal article supplement (doi:10.7554/elife.19920), 2016-10-22

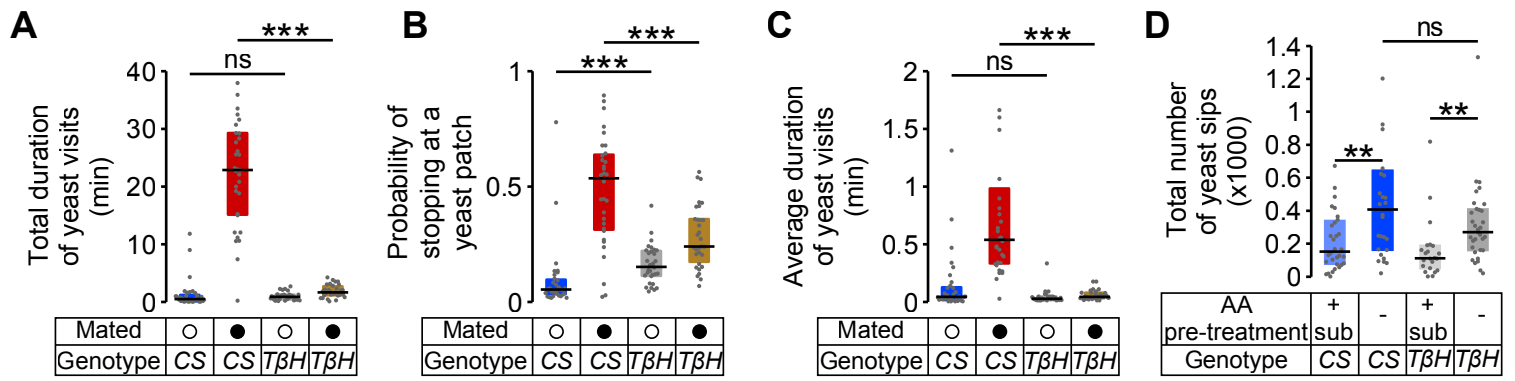

Figure 8 - figure supplement 1

Supplement: supp [file elife-19920-supp-v1.zip]

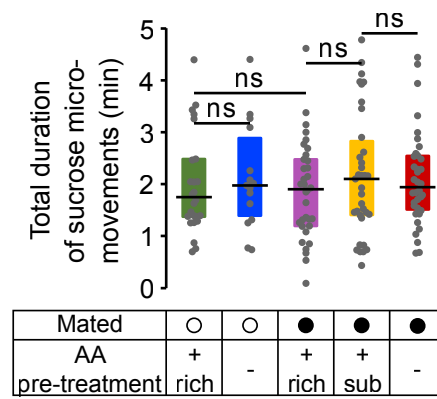

Figure 2 - figure supplement 2

Supplement: supp [file elife-19920-supp-v1.zip]

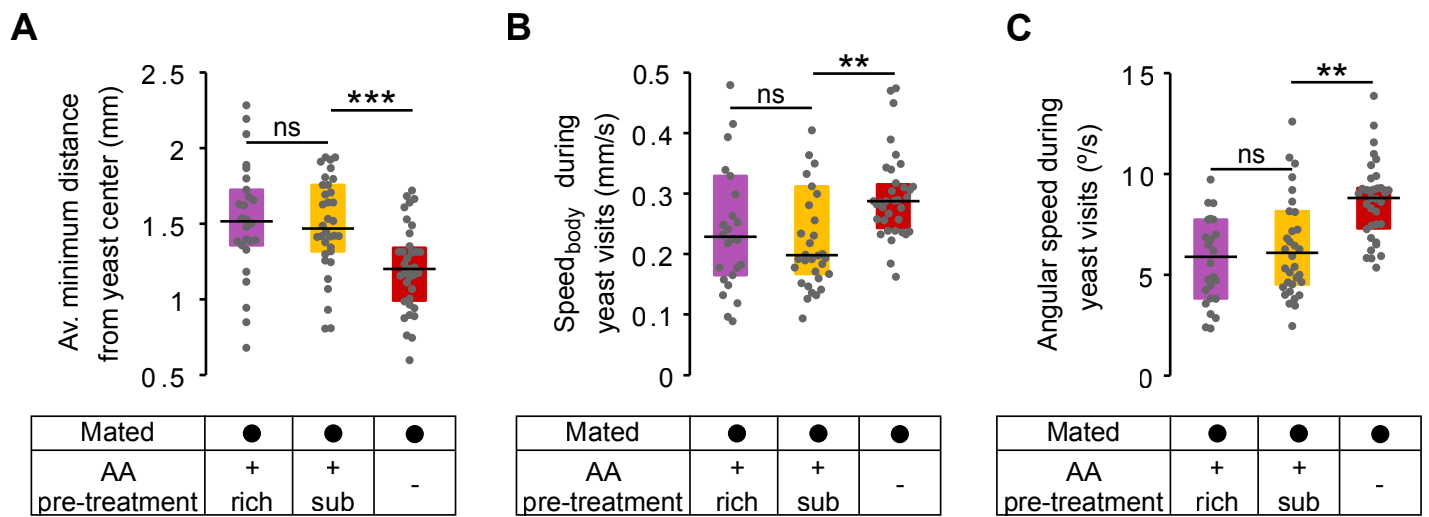

Figure 4 - figure supplement 2

Supplement: supp [file elife-19920-supp-v1.zip]

**A**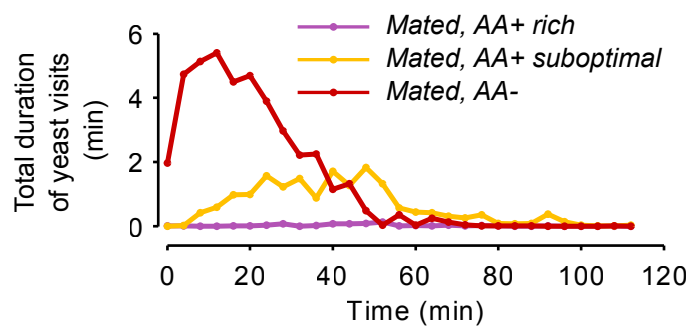**B**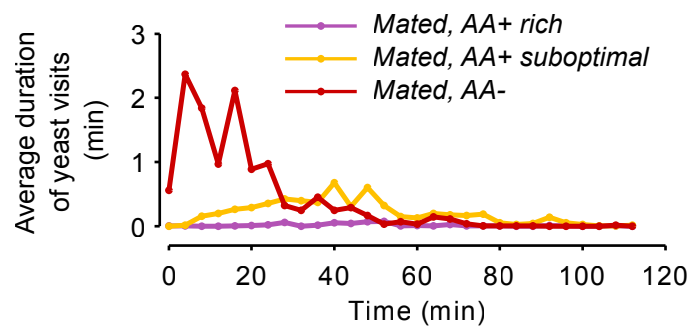**C**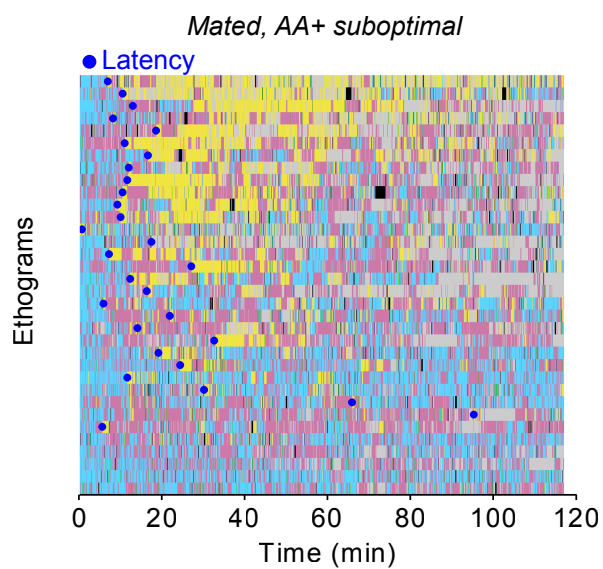**D**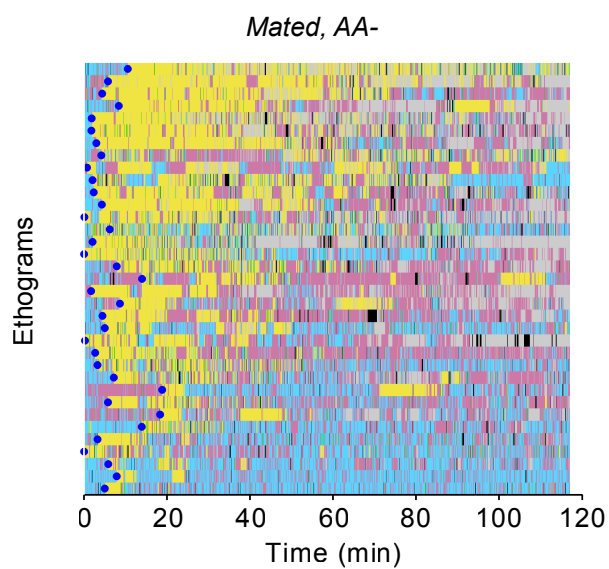

Figure 4 - figure supplement 1

Supplement: supp [file elife-19920-supp-v1.zip]

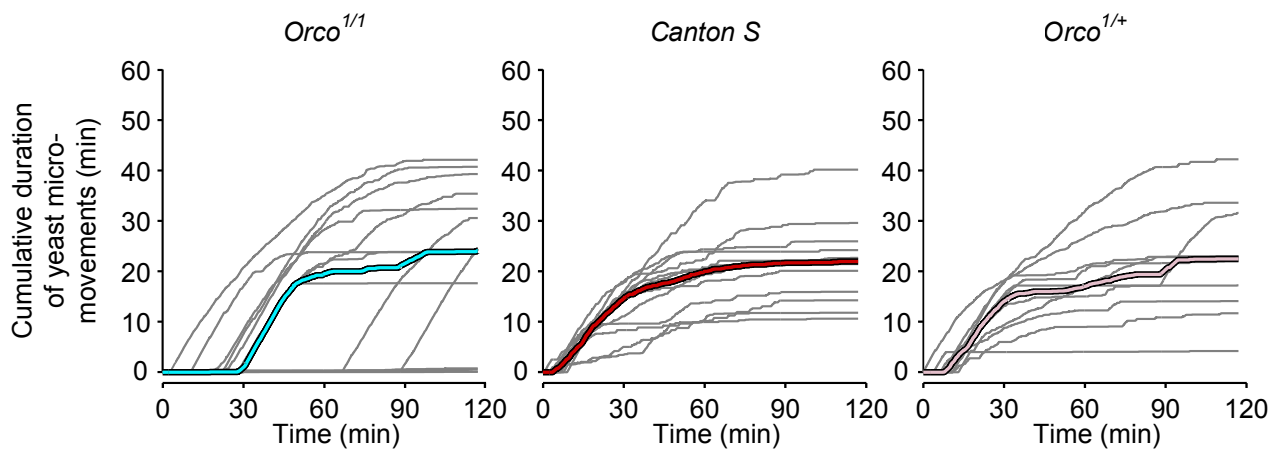

Figure 7 - figure supplement 1

Supplement: supp [file elife-19920-supp-v1.zip]

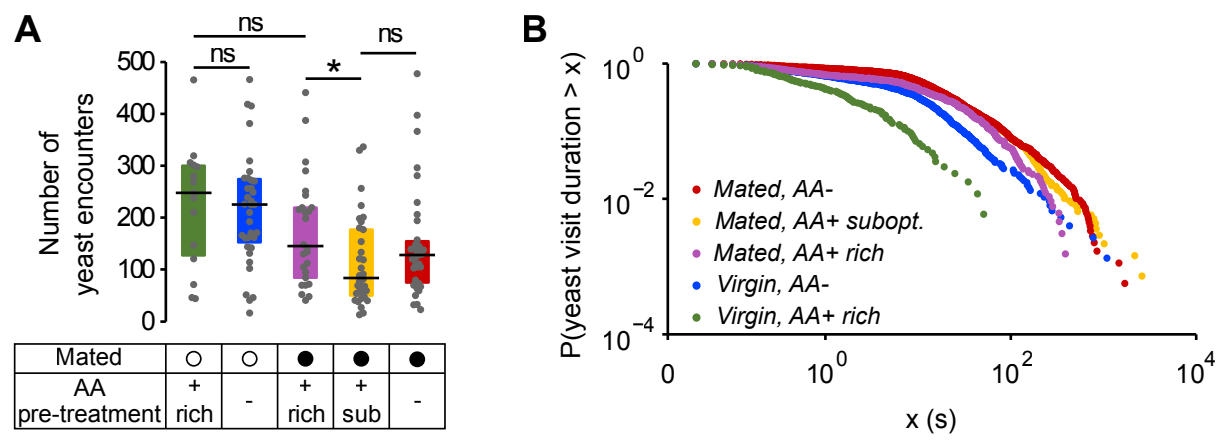

Figure 3 - figure supplement 1

Supplement: supp [file elife-19920-supp-v1.zip]

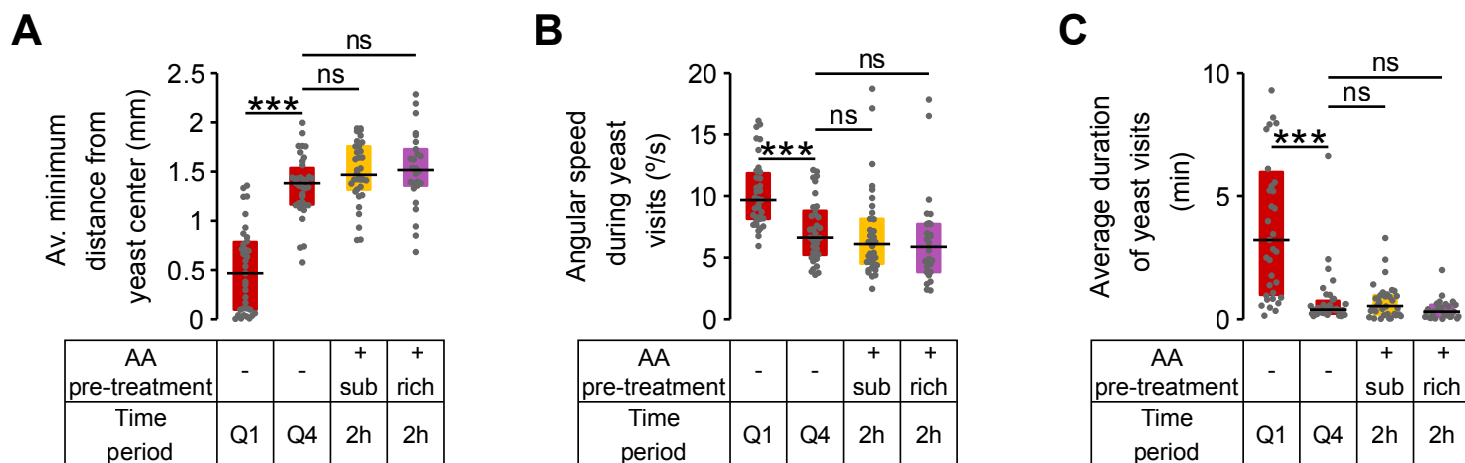

Figure 6 - figure supplement 1

Supplement: supp [file elife-19920-supp-v1.zip]

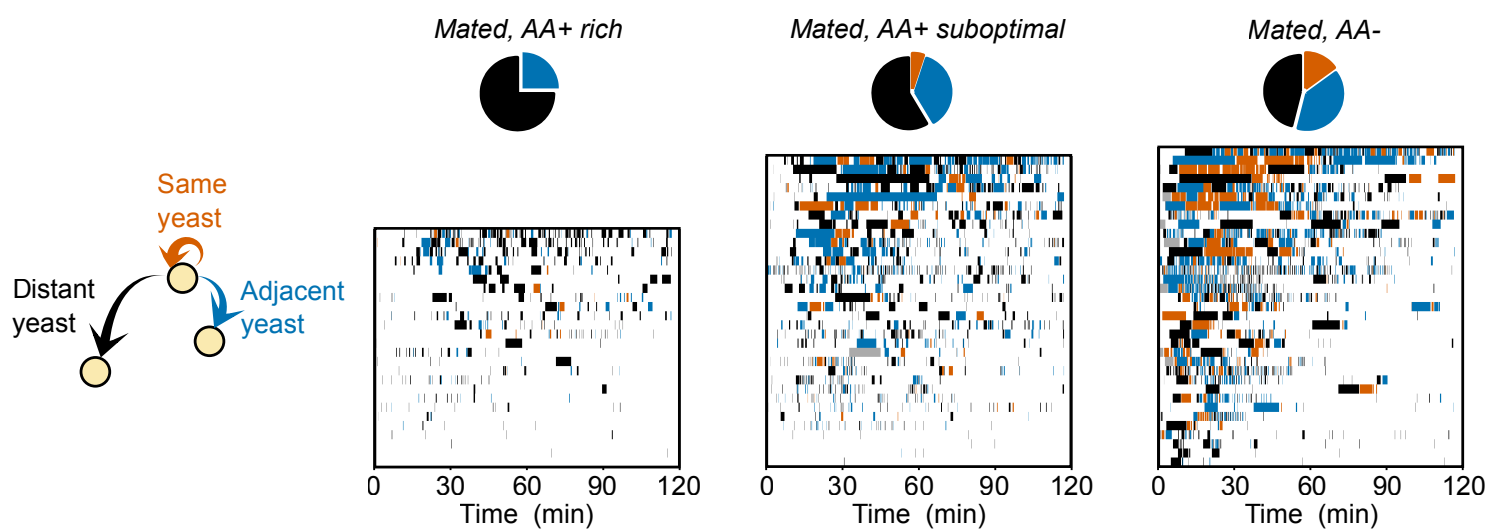

Figure 5 - figure supplement 1

Supplement: supp [file elife-19920-supp-v1.zip]

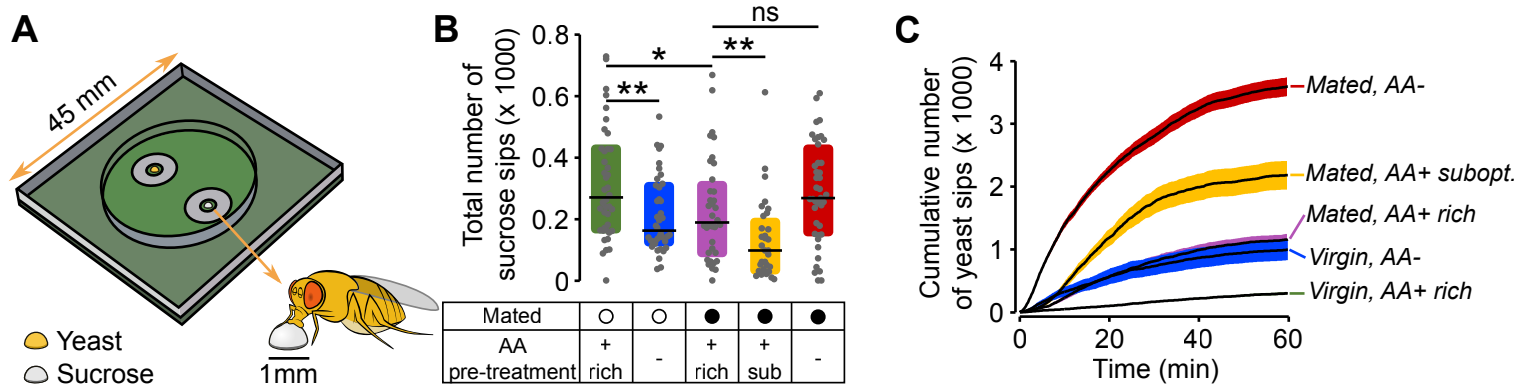

Figure 2 - figure supplement 1

Supplement: supp [file elife-19920-supp-v1.zip]

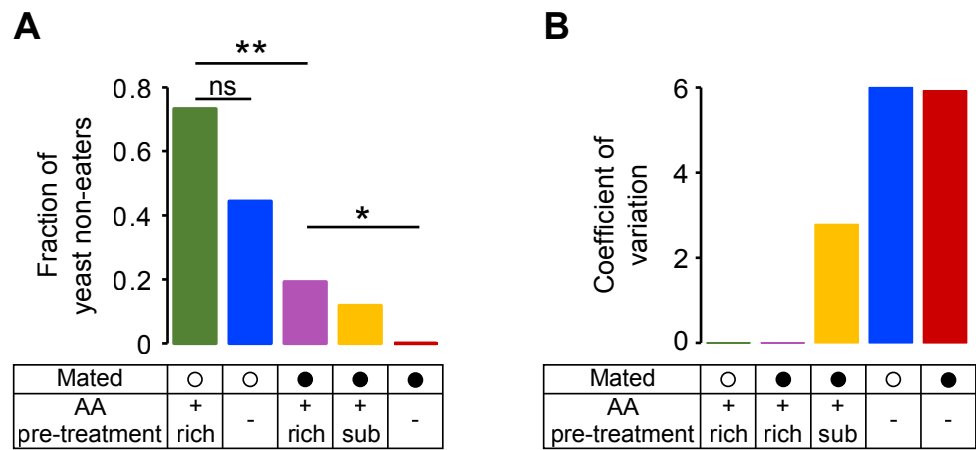

Figure 2 - figure supplement 3

Supplement: supp [file elife-19920-supp-v1.zip]

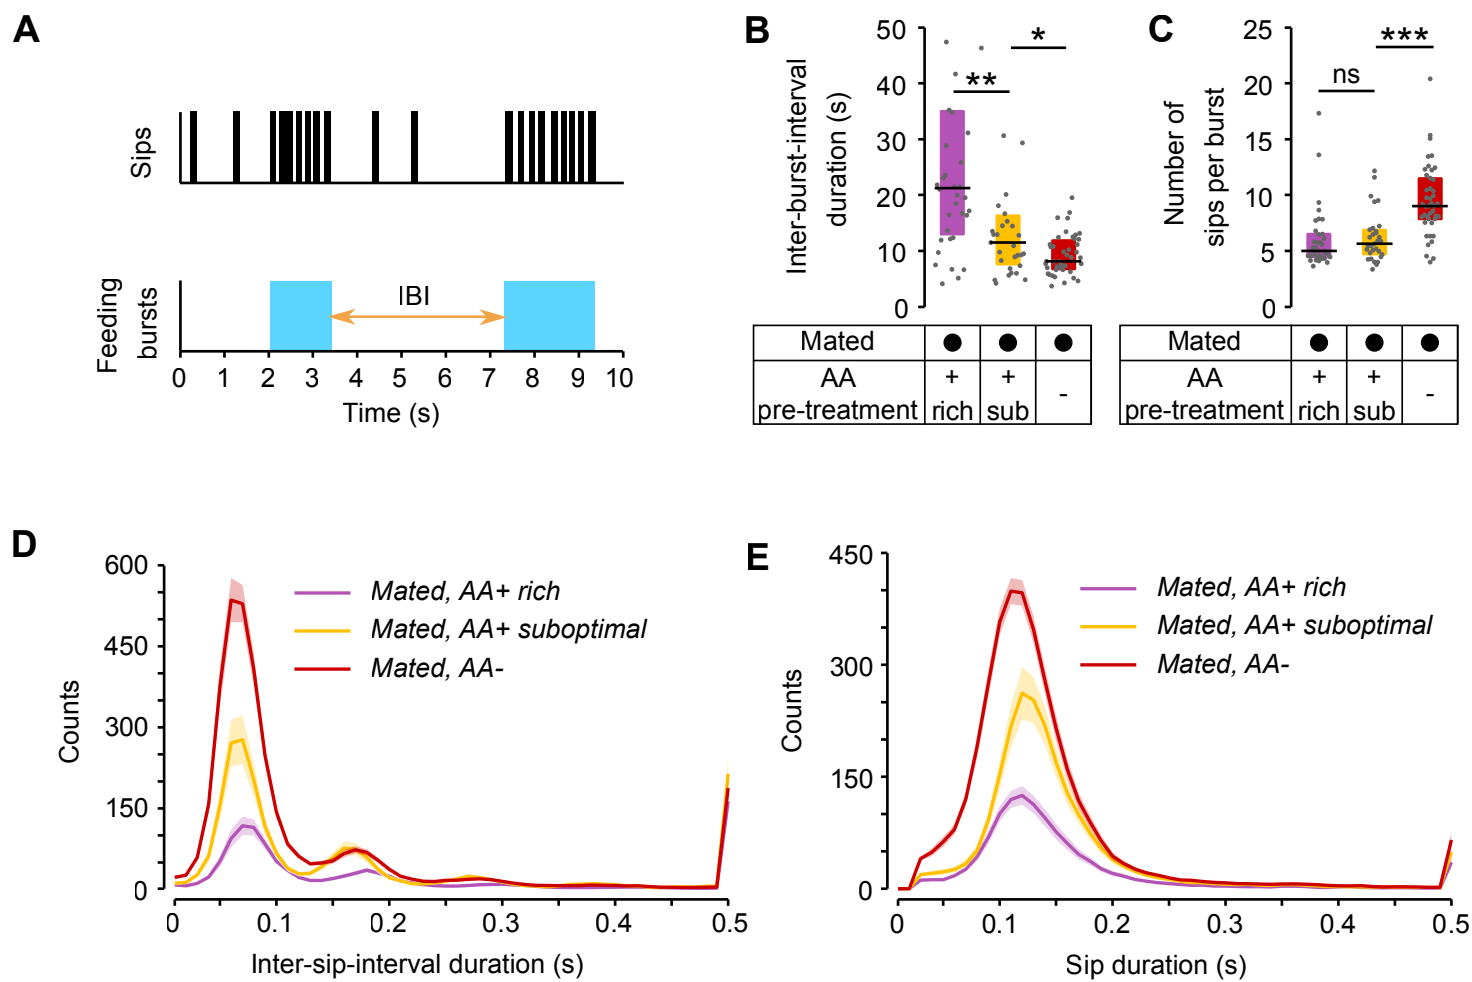

Figure 4 - figure supplement 3

Supplement: supp [file elife-19920-supp-v1.zip]

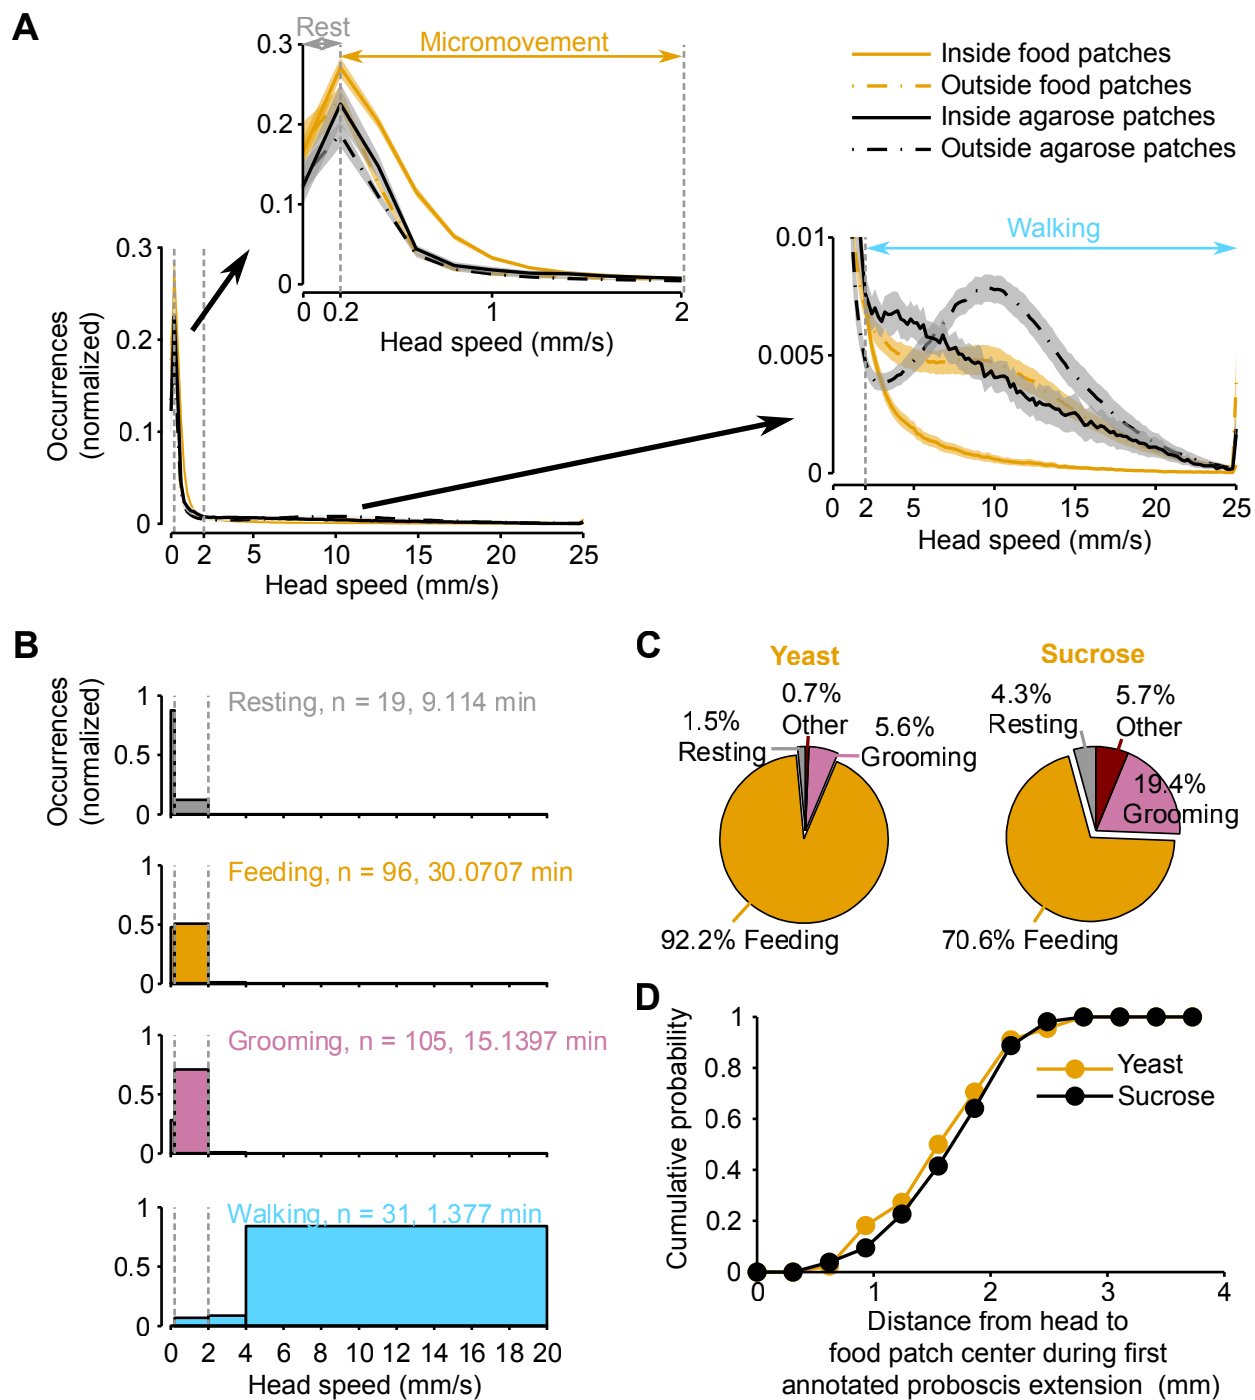

Figure 1 - figure supplement 1

Supplement: supp [file elife-19920-supp-v1.zip]
